# Supplementary material for: Characteristics and Spectrum of Cardiotoxicity Induced by Various Antipsychotics: A Real-World Study From 2015 to 2020 Based on FAERS
Source: Front Pharmacol. 2022 Feb 4;12:815151. doi: 10.3389/fphar.2021.815151 (PMC8854762; doi:10.3389/fphar.2021.815151)
Supplement: Supplementary file 1 [file Table1.XLSX]

## Sheet: Sheet1
	cardic failure		cardiomyopathy		ischemic heart disease		Tdp/QT		cardic arrhythmia
	a		a		a		a		a			a+b
OLA	402		187		314		597		349			21748
QUE	622		185		632		787		638			40850
RIS	327		71		248		346		294			25243
ARI	279		145		364		423		291			25397
AMI	61		41		62		96		41			1940
PAL	59		43		90		63		65			7277
ZIP	22		16		25		55		48			3349
CLO	338		273		521		335		194			13923
CHL	53		35		46		90		50			2733
HAL	252		57		179		249		206			10967
c	48210		9077		50477		12818		24198			2361487
ROR	cardic failure		cardiomyopathy		ischemic heart disease		Tdp/QT		cardic arrhythmia
OLA	0.905537		2.22964		0.675813		5.04021		1.56481
QUE	0.745994		1.17764		0.723956		3.54361		1.52355
RIS	0.634889		0.733122		0.460124		2.51968		1.13635
ARI	0.538554		1.48288		0.670822		3.061		1.11797
AMI	1.53346		5.2156		1.48924		8.74871		2.0364
PAL	0.399166		1.52787		0.579955		1.58754		0.872555
ZIP	0.326702		1.23385		0.353748		2.97139		1.393
CLO	1.18881		5.06325		1.74938		4.41023		1.35854
CHL	0.95036		3.2258		0.789231		5.90171		1.77163
HAL	1.12526		1.34804		0.764088		4.15638		1.82941
ROR	1	e(lnROR)		ROR025	ROR975		cardiomyopathy	e(lnROR)		ROR025	ROR975		ischemic heart disease	e(lnROR)		ROR025	ROR975		Tdp/QT	e(lnROR)		ROR025	ROR975		cardic arrhythmia	e(lnROR)		ROR025	ROR975
OLA	-0.0992272	0.905537	0.00250447	0.903272	0.907808		0.801841	2.22964	0.00539448	2.21765	2.2417		-0.391839	0.675813	0.00318658	0.673663	0.67797		1.61745	5.04021	0.00176475	5.03132	5.04911		0.447762	1.56481	0.00289474	1.56028	1.56934
QUE	-0.293038	0.745994	0.00162068	0.744786	0.747204		0.163517	1.17764	0.00542978	1.17127	1.18406		-0.323025	0.723956	0.00159484	0.722802	0.725111		1.26515	3.54361	0.00134657	3.53884	3.54838		0.421043	1.52355	0.00160134	1.52111	1.52599
RIS	-0.454306	0.634889	0.00305703	0.632951	0.636833		-0.310444	0.733122	0.0139501	0.722966	0.74342		-0.776259	0.460124	0.00401066	0.458283	0.461973		0.924132	2.51968	0.0029486	2.51226	2.52712		0.12782	1.13635	0.00341353	1.13248	1.14023
ARI	-0.618868	0.538554	0.00357231	0.536633	0.540481		0.393984	1.48288	0.00690581	1.47267	1.49315		-0.399251	0.670822	0.00275129	0.668979	0.67267		1.11874	3.061	0.0024329	3.05357	3.06846		0.111511	1.11797	0.00344765	1.11412	1.12183
AMI	0.427529	1.53346	0.0166079	1.50821	1.55914		1.65165	5.2156	0.0245269	5.08923	5.3451		0.398267	1.48924	0.0163481	1.46509	1.51379		2.16891	8.74871	0.0108167	8.65459	8.84386		0.711186	2.0364	0.0244594	1.9872	2.08683
PAL	-0.918377	0.399166	0.0167667	0.392529	0.405915		0.423872	1.52787	0.0230346	1.49307	1.56347		-0.544804	0.579955	0.0110451	0.573585	0.586396		0.462183	1.58754	0.0157683	1.5627	1.61277		-0.13633	0.872555	0.0152537	0.859346	0.885966
ZIP	-1.11871	0.326702	0.0448608	0.312369	0.341691		0.21014	1.23385	0.0616524	1.16008	1.31231		-1.03917	0.353748	0.0395147	0.340042	0.368006		1.08903	2.97139	0.0181926	2.91782	3.02594		0.331459	1.393	0.0207545	1.36439	1.42221
CLO	0.172949	1.18881	0.0029923	1.18525	1.19237		1.62201	5.06325	0.00376992	5.04419	5.08237		0.559262	1.74938	0.00197396	1.74593	1.75284		1.48393	4.41023	0.00307437	4.39669	4.42381		0.306413	1.35854	0.00516385	1.35155	1.36558
CHL	-0.0509148	0.95036	0.018877	0.932588	0.96847		1.17118	3.2258	0.0284716	3.13526	3.31897		-0.236696	0.789231	0.0216889	0.772298	0.806535		1.77524	5.90171	0.0113366	5.83518	5.96899		0.571898	1.77163	0.0200062	1.73654	1.80743
HAL	0.118015	1.12526	0.0040011	1.12077	1.12977		0.298651	1.34804	0.0173912	1.3248	1.37169		-0.269072	0.764088	0.00558554	0.759832	0.768368		1.42464	4.15638	0.00410405	4.13936	4.17347		0.603992	1.82941	0.00488927	1.82048	1.83837
IC	cardic failure		cardiomyopathy		ischemic heart disease		Tdp/QT		cardic arrhythmia
OLA	-0.143155		1.15681		-0.565304		2.33348		0.645984
QUE	-0.422764		0.235904		-0.466027		1.82522		0.607436
RIS	-0.655424		-0.447875		-1.1199		1.33324		0.184406
ARI	-0.892837		0.568399		-0.575998		1.61401		0.160876
AMI	0.616794		2.38283		0.574578		3.12907		1.02602
PAL	-1.32494		0.611518		-0.785987		0.666789		-0.196683
ZIP	-1.61395		0.303168		-1.49921		1.57114		0.478194
CLO	0.249513		2.34006		0.806845		2.14085		0.442061
CHL	-0.0734545		1.68966		-0.341481		2.56113		0.825075
HAL	0.170259		0.430862		-0.38819		2.05533		0.871376
IC	cardic failure		IC025	IC975		cardiomyopathy		IC025	IC975		ischemic heart disease		IC025	IC975		Tdp/QT		IC025	IC975		cardic arrhythmia		IC025	IC975
OLA	0.0498445	0.000123837	-0.307889	-0.0235897		0.0730297	0.000389492	0.915036	1.33189		0.0563884	0.000179295	-0.751744	-0.430062		0.0409101	6.84689e-05	2.19834	2.43163		0.0534905	0.000153049	0.46916	0.774285
QUE	0.0400802	6.43859e-05	-0.555157	-0.326603		0.0734223	0.000395808	-0.00718075	0.41192		0.0397621	6.2865e-05	-0.597368	-0.370629		0.0356348	4.52506e-05	1.70753	1.91072		0.0395749	6.1981e-05	0.476715	0.702385
RIS	0.0552579	0.000168726	-0.838113	-0.52289		0.118262	0.00165402	-0.84145	-0.164872		0.0634361	0.000255276	-1.32975	-0.967785		0.0537215	0.00015504	1.15565	1.4621		0.0582717	0.000197866	-0.00828621	0.324159
ARI	0.0598149	0.000214007	-1.09065	-0.749389		0.0829027	0.000569778	0.29368	0.76708		0.0523783	0.000143699	-0.749134	-0.450362		0.048593	0.000114741	1.45342	1.73057		0.0585707	0.000200929	-0.0328089	0.301346
AMI	0.127515	0.00207342	0.191846	0.921794		0.15523	0.00374048	1.86309	2.75351		0.126491	0.00202386	0.153109	0.877144		0.101797	0.00105489	2.79103	3.37286		0.15523	0.00374048	0.506284	1.39671
PAL	0.129641	0.00217884	-1.75711	-1.01489		0.15162	0.00348551	0.104203	0.973663		0.105118	0.00116152	-1.1352	-0.534285		0.125491	0.00197624	0.248716	0.96698		0.12356	0.00188642	-0.608205	0.0989191
ZIP	0.210819	0.00936971	-2.32839	-1.11267		0.246183	0.0149202	-0.539076	0.886547		0.19803	0.00776586	-2.16823	-1.02782		0.134231	0.00241858	1.12334	1.89208		0.143592	0.00296065	-0.00158001	0.821333
CLO	0.0543526	0.000160569	0.0698284	0.379879		0.0604674	0.000221087	2.14008	2.48507		0.0437898	8.39689e-05	0.662171	0.911898		0.0545951	0.000162728	1.96036	2.2718		0.0717035	0.000368655	0.204702	0.613965
CHL	0.136717	0.00255546	-0.529732	0.253389		0.167836	0.00472778	1.12634	2.0901		0.146647	0.0031537	-0.831724	0.00889544		0.105118	0.00116152	2.21192	2.81283		0.14072	0.00278652	0.355128	1.16141
HAL	0.0629317	0.000249234	-0.0379136	0.321171		0.131876	0.0022935	-0.00891633	0.746218		0.0746393	0.000415818	-0.635331	-0.209263		0.0633089	0.000253743	1.8459	2.20714		0.0695889	0.000336992	0.641059	1.03822

## Sheet: Sheet2
cardiomyophathy
		Atrial septal defect acquired	Biopsy heart abnormal	Cardiac amyloidosis	Cardiac hypertrophy	Cardiac sarcoidosis	Cardiac septal hypertrophy	Cardiac siderosis	Cardiomyopathy acute	Cardiomyopathy alcoholic	Cardiomyopathy neonatal	Cardiotoxicity	Congestive cardiomyopathy	Cytotoxic cardiomyopathy	Diabetic cardiomyopathy	Ejection fraction abnormal	Ejection fraction decreased	Eosinophilic myocarditis	Hypertensive cardiomyopathy	Hypertrophic cardiomyopathy	Ischaemic cardiomyopathy	Kearns-Sayre syndrome	Metabolic cardiomyopathy	Muscular dystrophy	Myocardial calcification	Myocardial fibrosis	Myocardial haemorrhage	Non-obstructive cardiomyopathy	Peripartum cardiomyopathy	Pulmonary arterial wedge pressure increased	Restrictive cardiomyopathy	Right ventricular ejection fraction decreased	Stress cardiomyopathy	Tachycardia induced cardiomyopathy	Thyrotoxic cardiomyopathy	Ventricular septal defect acquired	Viral cardiomyopathy	Cardiomyopathy
OLA					3							11	26				63				3												13					71
QUE					8							26	42				31			14	6					4			10	3			13					46
RIS										5			14				22																					33
ARI					3							8	27				28	15															17					59
AMI												6	17				11																					13
PAL												8	11				11																					14
ZIP					9												5																					6
CLO					6		9					26	47	3		5	76	9								37												120
CHL												15	7				5	9
HAL										4		5	4				9	8																				31
		10	7	126	182	17	50	10	42	13	1	1017	955	22	1	145	2615	120	49	217	532	2	3	43	7	139	16	11	28	48	52	13	1063	36	3	2	19	2272
ROR		Atrial septal defect acquired	Biopsy heart abnormal	Cardiac amyloidosis	Cardiac hypertrophy	Cardiac sarcoidosis	Cardiac septal hypertrophy	Cardiac siderosis	Cardiomyopathy acute	Cardiomyopathy alcoholic	Cardiomyopathy neonatal	Cardiotoxicity	Congestive cardiomyopathy	Cytotoxic cardiomyopathy	Diabetic cardiomyopathy	Ejection fraction abnormal	Ejection fraction decreased	Eosinophilic myocarditis	Hypertensive cardiomyopathy	Hypertrophic cardiomyopathy	Ischaemic cardiomyopathy	Kearns-Sayre syndrome	Metabolic cardiomyopathy	Muscular dystrophy	Myocardial calcification	Myocardial fibrosis	Myocardial haemorrhage	Non-obstructive cardiomyopathy	Peripartum cardiomyopathy	Pulmonary arterial wedge pressure increased	Restrictive cardiomyopathy	Right ventricular ejection fraction decreased	Stress cardiomyopathy	Tachycardia induced cardiomyopathy	Thyrotoxic cardiomyopathy	Ventricular septal defect acquired	Viral cardiomyopathy	Cardiomyopathy
OLA					1.60837							1.16562	2.85099				2.58312				0.648217												1.312					3.3374
QUE					2.32984							1.4647	2.49706				0.688745			3.40875	0.669912					1.54933			10.6669	2.63094			0.714731					1.16828
RIS										8.6077			1.35407				0.79078																					1.35155
ARI					1.4243							0.74317	2.55322				0.995687	8.65651															1.46662					2.38624
AMI												4.86716	13.6235				4.34247																					5.70466
PAL												2.33907	1.76262				1.34374																					1.93301
ZIP					12.5312												1.30687																					1.74633
CLO					4.13211		11.9528					4.07938	7.31209	5.55812		4.05934	4.80598	7.86747								28.4193												8.67194
CHL												9.24272	4.47228				1.55967	14.8698
HAL										8.03036		1.05302	0.861564				0.751324	8.0394																				2.85031
IC		Atrial septal defect acquired	Biopsy heart abnormal	Cardiac amyloidosis	Cardiac hypertrophy	Cardiac sarcoidosis	Cardiac septal hypertrophy	Cardiac siderosis	Cardiomyopathy acute	Cardiomyopathy alcoholic	Cardiomyopathy neonatal	Cardiotoxicity	Congestive cardiomyopathy	Cytotoxic cardiomyopathy	Diabetic cardiomyopathy	Ejection fraction abnormal	Ejection fraction decreased	Eosinophilic myocarditis	Hypertensive cardiomyopathy	Hypertrophic cardiomyopathy	Ischaemic cardiomyopathy	Kearns-Sayre syndrome	Metabolic cardiomyopathy	Muscular dystrophy	Myocardial calcification	Myocardial fibrosis	Myocardial haemorrhage	Non-obstructive cardiomyopathy	Peripartum cardiomyopathy	Pulmonary arterial wedge pressure increased	Restrictive cardiomyopathy	Right ventricular ejection fraction decreased	Stress cardiomyopathy	Tachycardia induced cardiomyopathy	Thyrotoxic cardiomyopathy	Ventricular septal defect acquired	Viral cardiomyopathy	Cardiomyopathy
OLA					0.685597							0.221095	1.51146				1.36911				-0.625452												0.391766					1.73872
QUE					1.22023							0.550601	1.32023				-0.537959			1.76924	-0.577956					0.631645			3.41507	1.39558			-0.484528					0.224389
RIS										3.10563			0.437306				-0.338651																					0.43461
ARI					0.510252							-0.428236	1.35232				-0.00623551	3.11379															0.552494					1.25474
AMI												2.28308	3.76802				2.11851																					2.51214
PAL												1.22594	0.817717				0.426253																					0.950851
ZIP					3.64745												0.386117																					0.804326
CLO					2.04688		3.57928					2.02835	2.87028	2.4746		2.02125	2.26483	2.9759								4.8288												3.11635
CHL												3.20832	2.16101				0.641237	3.89431
HAL										3.00546		0.074537	-0.21497				-0.412493	3.00709																				1.51112
ic025		Atrial septal defect acquired	Biopsy heart abnormal	Cardiac amyloidosis	Cardiac hypertrophy	Cardiac sarcoidosis	Cardiac septal hypertrophy	Cardiac siderosis	Cardiomyopathy acute	Cardiomyopathy alcoholic	Cardiomyopathy neonatal	Cardiotoxicity	Congestive cardiomyopathy	Cytotoxic cardiomyopathy	Diabetic cardiomyopathy	Ejection fraction abnormal	Ejection fraction decreased	Eosinophilic myocarditis	Hypertensive cardiomyopathy	Hypertrophic cardiomyopathy	Ischaemic cardiomyopathy	Kearns-Sayre syndrome	Metabolic cardiomyopathy	Muscular dystrophy	Myocardial calcification	Myocardial fibrosis	Myocardial haemorrhage	Non-obstructive cardiomyopathy	Peripartum cardiomyopathy	Pulmonary arterial wedge pressure increased	Restrictive cardiomyopathy	Right ventricular ejection fraction decreased	Stress cardiomyopathy	Tachycardia induced cardiomyopathy	Thyrotoxic cardiomyopathy	Ventricular septal defect acquired	Viral cardiomyopathy	Cardiomyopathy
OLA	3				-1.38377							-0.803306	0.855752				0.951039				-2.69482												-0.546701					1.34515
QUE	4				0.00763749							-0.105109	0.806817				-1.13725			0.866398	-1.99301					-1.1335			2.33788	-0.673789			-1.42299					-0.265854
RIS	1									1.54345			-0.465538				-1.05309																					-0.145858
ARI	3				-1.55911							-1.64083	0.709165				-0.637527	2.24281															-0.263677					0.822569
AMI	4											0.868026	2.95185				1.09411																					1.57367
PAL	2											0.0133407	-0.206684				-0.598148																					0.0480064
ZIP	1				2.50849												-1.17606																					-0.610727
CLO	9				0.631825		2.44031					1.37264	2.38536	0.405232		0.459066	1.88454	1.83694								4.2812												2.81422
CHL	3											2.33734	0.858649				-0.920943	2.75535
HAL	3									1.24032		-1.48764	-1.98012				-1.55146	1.79449																				0.911834
cardiac arrhythmia
		Chronotropic incompetence	Electrocardiogram repolarisation abnormality	Electrocardiogram RR interval prolonged	Electrocardiogram U wave inversion	Electrocardiogram U wave present	Electrocardiogram U-wave abnormality	Sudden cardiac death	Arrhythmia	Heart alternation	Heart rate irregular	Pacemaker generated arrhythmia	Pacemaker syndrome	Paroxysmal arrhythmia	Pulseless electrical activity	Reperfusion arrhythmia	Withdrawal arrhythmia	Accelerated idioventricular rhythm	Cardiac fibrillation	Parasystole	Rhythm idioventricular	Torsade de pointes	Ventricular arrhythmia	Ventricular extrasystoles	Ventricular fibrillation	Ventricular flutter	Ventricular parasystole	Ventricular pre-excitation	Ventricular tachyarrhythmia	Ventricular tachycardia
OLA		4						5	103		26				6							69	11	17	48					30
QUE			17					16	266		74				20		6		4			43	13	30	73					60
RIS			3			10	7	12	104		24				6							55	4	18	18					27
ARI			5					44	84		37				4							20	11	25	11					15
AMI									18													2			6					6
PAL									21		11											10		9
ZIP									18		7											5	4							11
CLO			9					19	70		15				4							18		34	6					9
CHL									17													23		3	5					6
HAL								6	61		17				3							51		24	43					14
		28	140	11	0	21	20	569	8169	11	4537	10	1	21	924	12	7	16	268	0	44	1362	647	1651	1924	20	0	3	39	2739
ROR		Chronotropic incompetence	Electrocardiogram repolarisation abnormality	Electrocardiogram RR interval prolonged	Electrocardiogram U wave inversion	Electrocardiogram U wave present	Electrocardiogram U-wave abnormality	Sudden cardiac death	Arrhythmia	Heart alternation	Heart rate irregular	Pacemaker generated arrhythmia	Pacemaker syndrome	Paroxysmal arrhythmia	Pulseless electrical activity	Reperfusion arrhythmia	Withdrawal arrhythmia	Accelerated idioventricular rhythm	Cardiac fibrillation	Parasystole	Rhythm idioventricular	Torsade de pointes	Ventricular arrhythmia	Ventricular extrasystoles	Ventricular fibrillation	Ventricular flutter	Ventricular parasystole	Ventricular pre-excitation	Ventricular tachyarrhythmia	Ventricular tachycardia
OLA		5.93774						0.958158	1.36666		0.626725				0.721458							5.32842	1.7806	1.11431	2.66206					1.18563
QUE			5.9895					1.59531	1.87926		0.943242				1.24365							1.80795	1.15463	1.04956	2.1757					1.26357
RIS			1.75305			14.4932	10.5073	1.89903	1.18991		0.50002				0.626382							3.6855	0.60679	1.01938	0.878171					0.0937628
ARI			2.74225					6.72266	0.956371		0.760743				0.431146							1.35333	1.54191	1.3968	0.542658					0.517408
AMI									2.56554													1.54425			3.1241					2.36352
PAL									0.837454		0.794149											2.23545		1.70019
ZIP									1.53082		1.08159											2.26193	3.17447							2.62295
CLO			7.16754					5.0587	1.44873		0.568817				0.756585							2.16877		3.37109	0.548818					0.570613
CHL									1.75806													11.3184		1.45184	2.0171					1.77116
HAL								0.987497	1.59999		0.8113				0.730513							7.54548		2.99972	4.61036					1.09681
ic		Chronotropic incompetence	Electrocardiogram repolarisation abnormality	Electrocardiogram RR interval prolonged	Electrocardiogram U wave inversion	Electrocardiogram U wave present	Electrocardiogram U-wave abnormality	Sudden cardiac death	Arrhythmia	Heart alternation	Heart rate irregular	Pacemaker generated arrhythmia	Pacemaker syndrome	Paroxysmal arrhythmia	Pulseless electrical activity	Reperfusion arrhythmia	Withdrawal arrhythmia	Accelerated idioventricular rhythm	Cardiac fibrillation	Parasystole	Rhythm idioventricular	Torsade de pointes	Ventricular arrhythmia	Ventricular extrasystoles	Ventricular fibrillation	Ventricular flutter	Ventricular parasystole	Ventricular pre-excitation	Ventricular tachyarrhythmia	Ventricular tachycardia
OLA		2.56991	#NUM!	#NUM!	#NUM!	#NUM!	#NUM!	-0.0616638	0.450656	#NUM!	-0.674095	#NUM!	#NUM!	#NUM!	-0.471013	#NUM!	#NUM!	#NUM!	#NUM!	#NUM!	#NUM!	2.41371	0.832359	0.156149	1.41254	#NUM!	#NUM!	#NUM!	#NUM!	0.245656
QUE		#NUM!	2.58244	#NUM!	#NUM!	#NUM!	#NUM!	0.673839	0.910168	#NUM!	-0.0843007	#NUM!	#NUM!	#NUM!	0.31458	#NUM!	#NUM!	#NUM!	#NUM!	#NUM!	#NUM!	0.854352	0.207428	0.0697896	1.12148	#NUM!	#NUM!	#NUM!	#NUM!	0.337501
RIS		#NUM!	0.809865	#NUM!	#NUM!	3.8573	3.39332	0.925265	0.250847	#NUM!	-0.999942	#NUM!	#NUM!	#NUM!	-0.674885	#NUM!	#NUM!	#NUM!	#NUM!	#NUM!	#NUM!	1.88186	-0.720731	0.0276921	-0.187426	#NUM!	#NUM!	#NUM!	#NUM!	-3.41484
ARI		#NUM!	1.45536	#NUM!	#NUM!	#NUM!	#NUM!	2.74903	-0.064358	#NUM!	-0.394519	#NUM!	#NUM!	#NUM!	-1.21375	#NUM!	#NUM!	#NUM!	#NUM!	#NUM!	#NUM!	0.436511	0.624721	0.48213	-0.881884	#NUM!	#NUM!	#NUM!	#NUM!	-0.950626
AMI		#NUM!	#NUM!	#NUM!	#NUM!	#NUM!	#NUM!	#NUM!	1.35926	#NUM!	#NUM!	#NUM!	#NUM!	#NUM!	#NUM!	#NUM!	#NUM!	#NUM!	#NUM!	#NUM!	#NUM!	0.62691	#NUM!	#NUM!	1.64344	#NUM!	#NUM!	#NUM!	#NUM!	1.24094
PAL		#NUM!	#NUM!	#NUM!	#NUM!	#NUM!	#NUM!	#NUM!	-0.255918	#NUM!	-0.332519	#NUM!	#NUM!	#NUM!	#NUM!	#NUM!	#NUM!	#NUM!	#NUM!	#NUM!	#NUM!	1.16056	#NUM!	0.765696	#NUM!	#NUM!	#NUM!	#NUM!	#NUM!	#NUM!
ZIP		#NUM!	#NUM!	#NUM!	#NUM!	#NUM!	#NUM!	#NUM!	0.6143	#NUM!	0.113149	#NUM!	#NUM!	#NUM!	#NUM!	#NUM!	#NUM!	#NUM!	#NUM!	#NUM!	#NUM!	1.17755	1.66652	#NUM!	#NUM!	#NUM!	#NUM!	#NUM!	#NUM!	1.39119
CLO		#NUM!	2.84148	#NUM!	#NUM!	#NUM!	#NUM!	2.33877	0.534789	#NUM!	-0.813963	#NUM!	#NUM!	#NUM!	-0.402425	#NUM!	#NUM!	#NUM!	#NUM!	#NUM!	#NUM!	1.11688	#NUM!	1.75322	-0.865601	#NUM!	#NUM!	#NUM!	#NUM!	-0.809416
CHL		#NUM!	#NUM!	#NUM!	#NUM!	#NUM!	#NUM!	#NUM!	0.813983	#NUM!	#NUM!	#NUM!	#NUM!	#NUM!	#NUM!	#NUM!	#NUM!	#NUM!	#NUM!	#NUM!	#NUM!	3.50059	#NUM!	0.53788	1.01228	#NUM!	#NUM!	#NUM!	#NUM!	0.824697
HAL		#NUM!	#NUM!	#NUM!	#NUM!	#NUM!	#NUM!	-0.0181516	0.678064	#NUM!	-0.301692	#NUM!	#NUM!	#NUM!	-0.453019	#NUM!	#NUM!	#NUM!	#NUM!	#NUM!	#NUM!	2.91561	#NUM!	1.58483	2.20488	#NUM!	#NUM!	#NUM!	#NUM!	0.133308
ic025		Chronotropic incompetence	Electrocardiogram repolarisation abnormality	Electrocardiogram RR interval prolonged	Electrocardiogram U wave inversion	Electrocardiogram U wave present	Electrocardiogram U-wave abnormality	Sudden cardiac death	Arrhythmia	Heart alternation	Heart rate irregular	Pacemaker generated arrhythmia	Pacemaker syndrome	Paroxysmal arrhythmia	Pulseless electrical activity	Reperfusion arrhythmia	Withdrawal arrhythmia	Accelerated idioventricular rhythm	Cardiac fibrillation	Parasystole	Rhythm idioventricular	Torsade de pointes	Ventricular arrhythmia	Ventricular extrasystoles	Ventricular fibrillation	Ventricular flutter	Ventricular parasystole	Ventricular pre-excitation	Ventricular tachyarrhythmia	Ventricular tachycardia
OLA	3	0.804765						-1.62384	0.124384		-1.3298				-1.88607							2.01441	-0.192042	-0.660021	0.932768					-0.363754
QUE	4		1.76627					-0.168405	0.707562		-0.469739				-0.435816							0.347036	-0.731039	-0.53962	0.733389					-0.0910136
RIS	3		-1.2595			2.78012	2.09096	-0.0533709	-0.0738422		-1.68314				-2.08994							1.43406	-2.48588	-0.764677	-0.979795					-4.05799
ARI	1		-0.10682					2.2476	-0.425926		-0.942116				-2.9789							-0.313885	-0.39968	-0.186899	-1.90629					-1.8216
AMI	2								0.566892													-1.96616			0.228389					-0.174115
PAL	1								-0.987676		-1.35692											0.0833788		-0.373269
ZIP	1								-0.178069		-1.18921											-0.384626	-0.0986315							0.366788
CLO	5		1.70251					1.56824	0.138386		-1.68494				-2.16757							0.324511		1.18152	-2.28065					-1.94838
CHL	1								-0.00218702													2.8023		-1.53149	-0.549897					-0.590356
HAL	4							-1.4332	0.253116		-1.11786				-2.52238							2.45036		0.901636	1.69757					-0.769537
cardiac failure
		Acute left ventricular failure	Acute pulmonary oedema	Acute right ventricular failure	Cardiac asthma	Cardiac failure	Cardiac failure acute	Cardiac failure chronic	Cardiac failure congestive	Cardiac failure high output	Cardiogenic shock	Cardiopulmonary failure	Cardiorenal syndrome	Chronic left ventricular failure	Chronic right ventricular failure	Cor pulmonale	Cor pulmonale acute	Cor pulmonale chronic	Ejection fraction decreased	Hepatic congestion	Hepatojugular reflux	Left ventricular failure	Low cardiac output syndrome	Neonatal cardiac failure	Obstructive shock	Pulmonary oedema	Pulmonary oedema neonatal	Radiation associated cardiac failure	Right ventricular ejection fraction decreased	Right ventricular failure	Ventricular failure
OLA			30			156	9		43		39	14				15	15		63			4				111				6
QUE			30			337	23	4	83		53	33				11	3	3	31	9		11				161				26
RIS			25			177	14	10	29		58								22	4						56				6
ARI						141	18		54		28	12				3		3	28	12		8				55				3
AMI		3				18	3				24					7	7		11							9
PAL						40	6	3											11							7
ZIP						9			7										5							6
CLO		3				150	19		40		23	14							76	21		7				74
CHL						35	5		6		5								5							8				3
HAL			25			137	7		24		25	16				3			9			3				34				8
		163	1176	52	22	32187	1527	991	15383	46	2481	672	170	67	14	356	80	57	2615	246	36	816	59	0	18	8584	34	0	13	2347	68
ROR		Acute left ventricular failure	Acute pulmonary oedema	Acute right ventricular failure	Cardiac asthma	Cardiac failure	Cardiac failure acute	Cardiac failure chronic	Cardiac failure congestive	Cardiac failure high output	Cardiogenic shock	Cardiopulmonary failure	Cardiorenal syndrome	Chronic left ventricular failure	Chronic right ventricular failure	Cor pulmonale	Cor pulmonale acute	Cor pulmonale chronic	Ejection fraction decreased	Hepatic congestion	Hepatojugular reflux	Left ventricular failure	Low cardiac output syndrome	Neonatal cardiac failure	Obstructive shock	Pulmonary oedema	Pulmonary oedema neonatal	Radiation associated cardiac failure	Right ventricular ejection fraction decreased	Right ventricular failure	Ventricular failure
OLA			2.69189			0.52707	0.652346		0.305974		1.69175	2.16782				4.10209	12.5328		2.58312			0.561453				1.40156				0.293924
QUE			1.46332			0.605615	0.873129	0.255062	0.313201		1.23223	2.76299				1.72718	1.85787	2.3553	0.688745	1.99772		0.786835				1.08397				0.644778
RIS			1.95091			0.515148	0.995685	0.946522	0.178857		2.16502								0.79078	1.43788						0.612411				0.254024
ARI						0.40818	1.09323		0.328434		1.04848	1.61768				0.808564		3.14461	0.995687	3.97374		0.916362				0.597944				0.135969
AMI		5.52131				0.686657	1.99492				9.65258					9.4642	13.2574		4.34247							1.25796
PAL						0.406279	1.24868	0.984862											1.34374							0.278274
ZIP						0.205865			0.336085										1.30687							0.512877
CLO		2.39558				0.790981	2.05199		0.444098		1.55345	3.24965							4.80598	11.0235		1.41216				1.45764
CHL						0.94038	2.42587		0.355132		1.63141								1.55967							0.814609				1.08823
HAL			4.27747			0.91679	0.98794		0.34056		2.12111	4.55695							0.751324			0.239472				0.8547				0.745632
IC		Acute left ventricular failure	Acute pulmonary oedema	Acute right ventricular failure	Cardiac asthma	Cardiac failure	Cardiac failure acute	Cardiac failure chronic	Cardiac failure congestive	Cardiac failure high output	Cardiogenic shock	Cardiopulmonary failure	Cardiorenal syndrome	Chronic left ventricular failure	Chronic right ventricular failure	Cor pulmonale	Cor pulmonale acute	Cor pulmonale chronic	Ejection fraction decreased	Hepatic congestion	Hepatojugular reflux	Left ventricular failure	Low cardiac output syndrome	Neonatal cardiac failure	Obstructive shock	Pulmonary oedema	Pulmonary oedema neonatal	Radiation associated cardiac failure	Right ventricular ejection fraction decreased	Right ventricular failure	Ventricular failure
OLA		#NUM!	1.42862	#NUM!	#NUM!	-0.923934	-0.616292	#NUM!	-1.70852	#NUM!	0.758514	1.11624	#NUM!	#NUM!	#NUM!	2.03636	3.64764	#NUM!	1.36911	#NUM!	#NUM!	-0.832762	#NUM!	#NUM!	#NUM!	0.487039	#NUM!	#NUM!	#NUM!	-1.76649	#NUM!
QUE		#NUM!	0.54925	#NUM!	#NUM!	-0.723526	-0.195733	-1.97108	-1.67484	#NUM!	0.301266	1.46623	#NUM!	#NUM!	#NUM!	0.788421	0.893653	1.23591	-0.537959	0.998357	#NUM!	-0.345867	#NUM!	#NUM!	#NUM!	0.116322	#NUM!	#NUM!	#NUM!	-0.633125	#NUM!
RIS		#NUM!	0.96415	#NUM!	#NUM!	-0.956942	-0.00623808	-0.0792923	-2.48312	#NUM!	1.11438	#NUM!	#NUM!	#NUM!	#NUM!	#NUM!	#NUM!	#NUM!	-0.338651	0.523944	#NUM!	#NUM!	#NUM!	#NUM!	#NUM!	-0.707427	#NUM!	#NUM!	#NUM!	-1.97696	#NUM!
ARI		#NUM!	#NUM!	#NUM!	#NUM!	-1.29272	0.128593	#NUM!	-1.60632	#NUM!	0.0682932	0.693923	#NUM!	#NUM!	#NUM!	-0.306566	#NUM!	1.65288	-0.00623551	1.9905	#NUM!	-0.12601	#NUM!	#NUM!	#NUM!	-0.741917	#NUM!	#NUM!	#NUM!	-2.87865	#NUM!
AMI		2.46501	#NUM!	#NUM!	#NUM!	-0.542339	0.996332	#NUM!	#NUM!	#NUM!	3.27091	#NUM!	#NUM!	#NUM!	#NUM!	3.24248	3.72873	#NUM!	2.11851	#NUM!	#NUM!	#NUM!	#NUM!	#NUM!	#NUM!	0.331089	#NUM!	#NUM!	#NUM!	#NUM!	#NUM!
PAL		#NUM!	#NUM!	#NUM!	#NUM!	-1.29946	0.320403	-0.0220072	#NUM!	#NUM!	#NUM!	#NUM!	#NUM!	#NUM!	#NUM!	#NUM!	#NUM!	#NUM!	0.426253	#NUM!	#NUM!	#NUM!	#NUM!	#NUM!	#NUM!	-1.84542	#NUM!	#NUM!	#NUM!	#NUM!	#NUM!
ZIP		#NUM!	#NUM!	#NUM!	#NUM!	-2.28023	#NUM!	#NUM!	-1.5731	#NUM!	#NUM!	#NUM!	#NUM!	#NUM!	#NUM!	#NUM!	#NUM!	#NUM!	0.386117	#NUM!	#NUM!	#NUM!	#NUM!	#NUM!	#NUM!	-0.963316	#NUM!	#NUM!	#NUM!	#NUM!	#NUM!
CLO		1.26037	#NUM!	#NUM!	#NUM!	-0.338285	1.03702	#NUM!	-1.17105	#NUM!	0.635475	1.70028	#NUM!	#NUM!	#NUM!	#NUM!	#NUM!	#NUM!	2.26483	3.46251	#NUM!	0.497901	#NUM!	#NUM!	#NUM!	0.543633	#NUM!	#NUM!	#NUM!	#NUM!	#NUM!
CHL		#NUM!	#NUM!	#NUM!	#NUM!	-0.0886848	1.2785	#NUM!	-1.49357	#NUM!	0.70612	#NUM!	#NUM!	#NUM!	#NUM!	#NUM!	#NUM!	#NUM!	0.641237	#NUM!	#NUM!	#NUM!	#NUM!	#NUM!	#NUM!	-0.29582	#NUM!	#NUM!	#NUM!	0.121983	#NUM!
HAL		#NUM!	2.09676	#NUM!	#NUM!	-0.125338	-0.0175044	#NUM!	-1.55402	#NUM!	1.08482	2.18807	#NUM!	#NUM!	#NUM!	#NUM!	#NUM!	#NUM!	-0.412493	#NUM!	#NUM!	-2.06207	#NUM!	#NUM!	#NUM!	-0.226509	#NUM!	#NUM!	#NUM!	-0.423464	#NUM!
ic025		Acute left ventricular failure	Acute pulmonary oedema	Acute right ventricular failure	Cardiac asthma	Cardiac failure	Cardiac failure acute	Cardiac failure chronic	Cardiac failure congestive	Cardiac failure high output	Cardiogenic shock	Cardiopulmonary failure	Cardiorenal syndrome	Chronic left ventricular failure	Chronic right ventricular failure	Cor pulmonale	Cor pulmonale acute	Cor pulmonale chronic	Ejection fraction decreased	Hepatic congestion	Hepatojugular reflux	Left ventricular failure	Low cardiac output syndrome	Neonatal cardiac failure	Obstructive shock	Pulmonary oedema	Pulmonary oedema neonatal	Radiation associated cardiac failure	Right ventricular ejection fraction decreased	Right ventricular failure	Ventricular failure
OLA	7	#NUM!	0.819212	#NUM!	#NUM!	-1.18874	-1.75526	#NUM!	-2.21584	#NUM!	0.225389	0.213399	#NUM!	#NUM!	#NUM!	1.16538	2.77666	#NUM!	0.951039	#NUM!	#NUM!	-2.59791	#NUM!	#NUM!	#NUM!	0.172821	#NUM!	#NUM!	#NUM!	-3.18154	#NUM!
QUE	1	#NUM!	-0.0601594	#NUM!	#NUM!	-0.903478	-0.894027	-3.73623	-2.03859	#NUM!	-0.155012	0.885763	#NUM!	#NUM!	#NUM!	-0.23598	-1.17571	-0.833455	-1.13725	-0.140608	#NUM!	-1.37027	#NUM!	#NUM!	#NUM!	-0.144326	#NUM!	#NUM!	#NUM!	-1.28883	#NUM!
RIS	2	#NUM!	0.295121	#NUM!	#NUM!	-1.20548	-0.909083	-1.15648	-3.10318	#NUM!	0.678455	#NUM!	#NUM!	#NUM!	#NUM!	#NUM!	#NUM!	#NUM!	-1.05309	-1.2412	#NUM!	#NUM!	#NUM!	#NUM!	#NUM!	-1.15116	#NUM!	#NUM!	#NUM!	-3.39202	#NUM!
ARI	1	#NUM!	#NUM!	#NUM!	#NUM!	-1.57133	-0.663776	#NUM!	-2.0583	#NUM!	-0.562998	-0.284713	#NUM!	#NUM!	#NUM!	-2.37593	#NUM!	-0.416485	-0.637527	1.01186	#NUM!	-1.33861	#NUM!	#NUM!	#NUM!	-1.18972	#NUM!	#NUM!	#NUM!	-4.94802	#NUM!
AMI	5	0.395646	#NUM!	#NUM!	#NUM!	-1.33471	-1.07303	#NUM!	#NUM!	#NUM!	2.58772	#NUM!	#NUM!	#NUM!	#NUM!	1.94012	2.42636	#NUM!	1.09411	#NUM!	#NUM!	#NUM!	#NUM!	#NUM!	#NUM!	-0.807876	#NUM!	#NUM!	#NUM!	#NUM!	#NUM!
PAL	0	#NUM!	#NUM!	#NUM!	#NUM!	-1.82576	-1.09465	-2.09137	#NUM!	#NUM!	#NUM!	#NUM!	#NUM!	#NUM!	#NUM!	#NUM!	#NUM!	#NUM!	-0.598148	#NUM!	#NUM!	#NUM!	#NUM!	#NUM!	#NUM!	-3.14779	#NUM!	#NUM!	#NUM!	#NUM!	#NUM!
ZIP	0	#NUM!	#NUM!	#NUM!	#NUM!	-3.4192	#NUM!	#NUM!	-2.87546	#NUM!	#NUM!	#NUM!	#NUM!	#NUM!	#NUM!	#NUM!	#NUM!	#NUM!	-1.17606	#NUM!	#NUM!	#NUM!	#NUM!	#NUM!	#NUM!	-2.37837	#NUM!	#NUM!	#NUM!	#NUM!	#NUM!
CLO	5	-0.808992	#NUM!	#NUM!	#NUM!	-0.608364	0.266493	#NUM!	-1.69735	#NUM!	-0.0628196	0.797439	#NUM!	#NUM!	#NUM!	#NUM!	#NUM!	#NUM!	1.88454	2.73075	#NUM!	-0.804462	#NUM!	#NUM!	#NUM!	0.158195	#NUM!	#NUM!	#NUM!	#NUM!	#NUM!
CHL	0	#NUM!	#NUM!	#NUM!	#NUM!	-0.652	-0.283679	#NUM!	-2.90863	#NUM!	-0.85606	#NUM!	#NUM!	#NUM!	#NUM!	#NUM!	#NUM!	#NUM!	-0.920943	#NUM!	#NUM!	#NUM!	#NUM!	#NUM!	#NUM!	-1.50842	#NUM!	#NUM!	#NUM!	-1.94738	#NUM!
HAL	3	#NUM!	1.42773	#NUM!	#NUM!	-0.408003	-1.31987	#NUM!	-2.23721	#NUM!	0.415787	1.34583	#NUM!	#NUM!	#NUM!	#NUM!	#NUM!	#NUM!	-1.55146	#NUM!	#NUM!	-4.13144	#NUM!	#NUM!	#NUM!	-0.798208	#NUM!	#NUM!	#NUM!	-1.63606	#NUM!
ischemic heart disease
		Acute coronary syndrome	Acute myocardial infarction	Angina unstable	Blood creatine phosphokinase MB abnormal	Blood creatine phosphokinase MB increased	Coronary artery embolism	Coronary artery occlusion	Coronary artery reocclusion	Coronary artery thrombosis	Coronary bypass thrombosis	Coronary vascular graft occlusion	Kounis syndrome	Myocardial infarction	Coronary arterial stent insertion	Coronary artery bypass	Coronary artery compression	Coronary artery disease	Coronary artery dissection	Coronary artery insufficiency	Coronary artery restenosis	Coronary artery stenosis	Coronary artery surgery	Coronary brachytherapy	Coronary bypass stenosis	Coronary endarterectomy	Coronary no-reflow phenomenon	Myocardial necrosis	Myocardial reperfusion injury	Myocardial stunning	Papillary muscle infarction	Periprocedural myocardial infarction	Post procedural myocardial infarction	Postinfarction angina	Silent myocardial infarction	Troponin I increased	Troponin increased	Troponin T increased	Angina pectoris	Angina unstable	Anginal equivalent	Arteriosclerosis coronary artery	Arteriospasm coronary	Coronary angioplasty	Coronary ostial stenosis	Coronary vascular graft stenosis	Dissecting coronary artery aneurysm	ECG signs of myocardial ischaemia	External counterpulsation
OLA		16	39											120				17										4								11	53	10	18			18
QUE		20	66	7		5		19						240	6			37				11						10							4	32	71	4	108	7		11	6					3
RIS		9	35			5								110	4			13				3						9								12	17		36			3
ARI		6	21	5		3		12						162				9				3						5								12	59	12	29	5		28
AMI														27																							16	4	4			6
PAL			14											34				4																			16	3	13
ZIP														9																							7
CLO		6	34											166								8						13								29	173	39	23			62						3
CHL		3	3											14				16										3										7	3
HAL		23	30			4								55				8				5						4								3		14	8			3
		1944	7159	1428	11	167	48	2175	18	251	15	16	351	23820	1095	1031	4	5504	74	56	68	844	7	0	0	1	3	477	8	41	2	13	16	8	88	348	1334	233	5423	1428	10	1092	570	63	19	2	1	32	0
ROR		Acute coronary syndrome	Acute myocardial infarction	Angina unstable	Blood creatine phosphokinase MB abnormal	Blood creatine phosphokinase MB increased	Coronary artery embolism	Coronary artery occlusion	Coronary artery reocclusion	Coronary artery thrombosis	Coronary bypass thrombosis	Coronary vascular graft occlusion	Kounis syndrome	Myocardial infarction	Coronary arterial stent insertion	Coronary artery bypass	Coronary artery compression	Coronary artery disease	Coronary artery dissection	Coronary artery insufficiency	Coronary artery restenosis	Coronary artery stenosis	Coronary artery surgery	Coronary brachytherapy	Coronary bypass stenosis	Coronary endarterectomy	Coronary no-reflow phenomenon	Myocardial necrosis	Myocardial reperfusion injury	Myocardial stunning	Papillary muscle infarction	Periprocedural myocardial infarction	Post procedural myocardial infarction	Postinfarction angina	Silent myocardial infarction	Troponin I increased	Troponin increased	Troponin T increased	Angina pectoris	Angina unstable	Anginal equivalent	Arteriosclerosis coronary artery	Arteriospasm coronary	Coronary angioplasty	Coronary ostial stenosis	Coronary vascular graft stenosis	Dissecting coronary artery aneurysm	ECG signs of myocardial ischaemia	External counterpulsation
OLA		0.896584	0.594607											0.548053				0.341872										0.919698								3.10401	4.18446	3.96855	0.366752			1.75244
QUE		0.600677	0.534826	0.297594		1.62298		0.511488						0.582962	0.334332			0.391806				0.761596						1.19982							2.22523	4.98478	3.03273	0.993261	1.15047	0.297594		0.593093	0.627407					3.3221
RIS		0.446422	0.460885			2.40686								0.433125	0.368703			0.227523				0.367574						1.69677								2.96214	1.18566		0.624264			0.287524
ARI		0.303638	0.277446	0.346836		1.52437		0.523201						0.633094				0.159146				0.365461						0.976914								2.94629	4.00762	4.15858	0.501508	0.346836		2.32765
AMI														1.37031																							10.339	6.50841	0.908158			4.65251
PAL														0.466834				0.257721																			3.57858	2.87357	0.784375
ZIP														0.277122																							3.13566
CLO		0.543408	0.807802											1.18136								1.5522						4.07569								11.5606	20.741	21.0809	0.723672			9.008						5.08228
CHL		1.2728	0.398394											0.516614				2.40178										3.32686										9.74461	0.516517
HAL		2.46638	0.90378			3.52785								0.499448				0.326156				1.24445						1.65731								1.65395		9.16517	0.330933			0.180507
IC		Acute coronary syndrome	Acute myocardial infarction	Angina unstable	Blood creatine phosphokinase MB abnormal	Blood creatine phosphokinase MB increased	Coronary artery embolism	Coronary artery occlusion	Coronary artery reocclusion	Coronary artery thrombosis	Coronary bypass thrombosis	Coronary vascular graft occlusion	Kounis syndrome	Myocardial infarction	Coronary arterial stent insertion	Coronary artery bypass	Coronary artery compression	Coronary artery disease	Coronary artery dissection	Coronary artery insufficiency	Coronary artery restenosis	Coronary artery stenosis	Coronary artery surgery	Coronary brachytherapy	Coronary bypass stenosis	Coronary endarterectomy	Coronary no-reflow phenomenon	Myocardial necrosis	Myocardial reperfusion injury	Myocardial stunning	Papillary muscle infarction	Periprocedural myocardial infarction	Post procedural myocardial infarction	Postinfarction angina	Silent myocardial infarction	Troponin I increased	Troponin increased	Troponin T increased	Angina pectoris	Angina unstable	Anginal equivalent	Arteriosclerosis coronary artery	Arteriospasm coronary	Coronary angioplasty	Coronary ostial stenosis	Coronary vascular graft stenosis	Dissecting coronary artery aneurysm	ECG signs of myocardial ischaemia	External counterpulsation
OLA		-0.157489	-0.749992	#NUM!	#NUM!	#NUM!	#NUM!	#NUM!	#NUM!	#NUM!	#NUM!	#NUM!	#NUM!	-0.867612	#NUM!	#NUM!	#NUM!	-1.54847	#NUM!	#NUM!	#NUM!	#NUM!	#NUM!	#NUM!	#NUM!	#NUM!	#NUM!	-0.120767	#NUM!	#NUM!	#NUM!	#NUM!	#NUM!	#NUM!	#NUM!	1.63413	2.06504	1.98861	-1.44712	#NUM!	#NUM!	0.809363	#NUM!	#NUM!	#NUM!	#NUM!	#NUM!	#NUM!	#NUM!
QUE		-0.735338	-0.902857	-1.74858	#NUM!	0.698642	#NUM!	-0.967228	#NUM!	#NUM!	#NUM!	#NUM!	#NUM!	-0.778527	-1.58065	#NUM!	#NUM!	-1.35179	#NUM!	#NUM!	#NUM!	-0.392902	#NUM!	#NUM!	#NUM!	#NUM!	#NUM!	0.262812	#NUM!	#NUM!	#NUM!	#NUM!	#NUM!	#NUM!	1.15396	2.31753	1.60062	-0.00975561	0.202222	-1.74858	#NUM!	-0.75367	-0.672526	#NUM!	#NUM!	#NUM!	#NUM!	1.7321	#NUM!
RIS		-1.16352	-1.11752	#NUM!	#NUM!	1.26715	#NUM!	#NUM!	#NUM!	#NUM!	#NUM!	#NUM!	#NUM!	-1.20715	-1.43947	#NUM!	#NUM!	-2.13592	#NUM!	#NUM!	#NUM!	-1.44389	#NUM!	#NUM!	#NUM!	#NUM!	#NUM!	0.762792	#NUM!	#NUM!	#NUM!	#NUM!	#NUM!	#NUM!	#NUM!	1.56664	0.245689	#NUM!	-0.679773	#NUM!	#NUM!	-1.79824	#NUM!	#NUM!	#NUM!	#NUM!	#NUM!	#NUM!	#NUM!
ARI		-1.71958	-1.84972	-1.52768	#NUM!	0.608214	#NUM!	-0.934563	#NUM!	#NUM!	#NUM!	#NUM!	#NUM!	-0.659509	#NUM!	#NUM!	#NUM!	-2.65158	#NUM!	#NUM!	#NUM!	-1.45221	#NUM!	#NUM!	#NUM!	#NUM!	#NUM!	-0.0336969	#NUM!	#NUM!	#NUM!	#NUM!	#NUM!	#NUM!	#NUM!	1.5589	2.00275	2.05609	-0.995654	-1.52768	#NUM!	1.21888	#NUM!	#NUM!	#NUM!	#NUM!	#NUM!	#NUM!	#NUM!
AMI		#NUM!	#NUM!	#NUM!	#NUM!	#NUM!	#NUM!	#NUM!	#NUM!	#NUM!	#NUM!	#NUM!	#NUM!	0.454498	#NUM!	#NUM!	#NUM!	#NUM!	#NUM!	#NUM!	#NUM!	#NUM!	#NUM!	#NUM!	#NUM!	#NUM!	#NUM!	#NUM!	#NUM!	#NUM!	#NUM!	#NUM!	#NUM!	#NUM!	#NUM!	#NUM!	3.37002	2.7023	-0.138984	#NUM!	#NUM!	2.21801	#NUM!	#NUM!	#NUM!	#NUM!	#NUM!	#NUM!	#NUM!
PAL		#NUM!	#NUM!	#NUM!	#NUM!	#NUM!	#NUM!	#NUM!	#NUM!	#NUM!	#NUM!	#NUM!	#NUM!	-1.09902	#NUM!	#NUM!	#NUM!	-1.95612	#NUM!	#NUM!	#NUM!	#NUM!	#NUM!	#NUM!	#NUM!	#NUM!	#NUM!	#NUM!	#NUM!	#NUM!	#NUM!	#NUM!	#NUM!	#NUM!	#NUM!	#NUM!	1.83939	1.52284	-0.350384	#NUM!	#NUM!	#NUM!	#NUM!	#NUM!	#NUM!	#NUM!	#NUM!	#NUM!	#NUM!
ZIP		#NUM!	#NUM!	#NUM!	#NUM!	#NUM!	#NUM!	#NUM!	#NUM!	#NUM!	#NUM!	#NUM!	#NUM!	-1.85141	#NUM!	#NUM!	#NUM!	#NUM!	#NUM!	#NUM!	#NUM!	#NUM!	#NUM!	#NUM!	#NUM!	#NUM!	#NUM!	#NUM!	#NUM!	#NUM!	#NUM!	#NUM!	#NUM!	#NUM!	#NUM!	#NUM!	1.64877	#NUM!	#NUM!	#NUM!	#NUM!	#NUM!	#NUM!	#NUM!	#NUM!	#NUM!	#NUM!	#NUM!	#NUM!
CLO		-0.879893	-0.307926	#NUM!	#NUM!	#NUM!	#NUM!	#NUM!	#NUM!	#NUM!	#NUM!	#NUM!	#NUM!	0.240447	#NUM!	#NUM!	#NUM!	#NUM!	#NUM!	#NUM!	#NUM!	0.634312	#NUM!	#NUM!	#NUM!	#NUM!	#NUM!	2.02704	#NUM!	#NUM!	#NUM!	#NUM!	#NUM!	#NUM!	#NUM!	3.53115	4.37441	4.39786	-0.466591	#NUM!	#NUM!	3.17121	#NUM!	#NUM!	#NUM!	#NUM!	#NUM!	2.34548	#NUM!
CHL		0.348011	-1.32773	#NUM!	#NUM!	#NUM!	#NUM!	#NUM!	#NUM!	#NUM!	#NUM!	#NUM!	#NUM!	-0.952843	#NUM!	#NUM!	#NUM!	1.26411	#NUM!	#NUM!	#NUM!	#NUM!	#NUM!	#NUM!	#NUM!	#NUM!	#NUM!	1.73416	#NUM!	#NUM!	#NUM!	#NUM!	#NUM!	#NUM!	#NUM!	#NUM!	#NUM!	3.28461	-0.953112	#NUM!	#NUM!	#NUM!	#NUM!	#NUM!	#NUM!	#NUM!	#NUM!	#NUM!	#NUM!
HAL		1.30239	-0.145957	#NUM!	#NUM!	1.81879	#NUM!	#NUM!	#NUM!	#NUM!	#NUM!	#NUM!	#NUM!	-1.00159	#NUM!	#NUM!	#NUM!	-1.61637	#NUM!	#NUM!	#NUM!	0.315507	#NUM!	#NUM!	#NUM!	#NUM!	#NUM!	0.728846	#NUM!	#NUM!	#NUM!	#NUM!	#NUM!	#NUM!	#NUM!	0.725913	#NUM!	3.19616	-1.59539	#NUM!	#NUM!	-2.46988	#NUM!	#NUM!	#NUM!	#NUM!	#NUM!	#NUM!	#NUM!
ic025		Acute coronary syndrome	Acute myocardial infarction	Angina unstable	Blood creatine phosphokinase MB abnormal	Blood creatine phosphokinase MB increased	Coronary artery embolism	Coronary artery occlusion	Coronary artery reocclusion	Coronary artery thrombosis	Coronary bypass thrombosis	Coronary vascular graft occlusion	Kounis syndrome	Myocardial infarction	Coronary arterial stent insertion	Coronary artery bypass	Coronary artery compression	Coronary artery disease	Coronary artery dissection	Coronary artery insufficiency	Coronary artery restenosis	Coronary artery stenosis	Coronary artery surgery	Coronary brachytherapy	Coronary bypass stenosis	Coronary endarterectomy	Coronary no-reflow phenomenon	Myocardial necrosis	Myocardial reperfusion injury	Myocardial stunning	Papillary muscle infarction	Periprocedural myocardial infarction	Post procedural myocardial infarction	Postinfarction angina	Silent myocardial infarction	Troponin I increased	Troponin increased	Troponin T increased	Angina pectoris	Angina unstable	Anginal equivalent	Arteriosclerosis coronary artery	Arteriospasm coronary	Coronary angioplasty	Coronary ostial stenosis	Coronary vascular graft stenosis	Dissecting coronary artery aneurysm	ECG signs of myocardial ischaemia	External counterpulsation
OLA	5	-0.999733	-1.28312	#NUM!	#NUM!	#NUM!	#NUM!	#NUM!	#NUM!	#NUM!	#NUM!	#NUM!	#NUM!	-1.16975	#NUM!	#NUM!	#NUM!	-2.36464	#NUM!	#NUM!	#NUM!	#NUM!	#NUM!	#NUM!	#NUM!	#NUM!	#NUM!	-1.88592	#NUM!	#NUM!	#NUM!	#NUM!	#NUM!	#NUM!	#NUM!	0.609731	1.60876	0.911428	-2.23949	#NUM!	#NUM!	0.0169944	#NUM!	#NUM!	#NUM!	#NUM!	#NUM!	#NUM!	#NUM!
QUE	2	-1.48573	-1.31122	-3.05095	#NUM!	-0.863538	#NUM!	-1.73776	#NUM!	#NUM!	#NUM!	#NUM!	#NUM!	-0.991855	-2.9957	#NUM!	#NUM!	-1.89938	#NUM!	#NUM!	#NUM!	-1.4173	#NUM!	#NUM!	#NUM!	#NUM!	#NUM!	-0.814372	#NUM!	#NUM!	#NUM!	#NUM!	#NUM!	#NUM!	-0.611192	1.72788	1.20704	-1.7749	-0.116357	-3.05095	#NUM!	-1.77807	-2.08758	#NUM!	#NUM!	#NUM!	#NUM!	-0.337269	#NUM!
RIS	1	-2.30248	-1.68084	#NUM!	#NUM!	-0.29503	#NUM!	#NUM!	#NUM!	#NUM!	#NUM!	#NUM!	#NUM!	-1.5228	-3.20462	#NUM!	#NUM!	-3.07438	#NUM!	#NUM!	#NUM!	-3.51326	#NUM!	#NUM!	#NUM!	#NUM!	#NUM!	-0.376173	#NUM!	#NUM!	#NUM!	#NUM!	#NUM!	#NUM!	#NUM!	0.588002	-0.570482	#NUM!	-1.23506	#NUM!	#NUM!	-3.86761	#NUM!	#NUM!	#NUM!	#NUM!	#NUM!	#NUM!	#NUM!
ARI	4	-3.13463	-2.58148	-3.08986	#NUM!	-1.46115	#NUM!	-1.9132	#NUM!	#NUM!	#NUM!	#NUM!	#NUM!	-0.919348	#NUM!	#NUM!	#NUM!	-3.79054	#NUM!	#NUM!	#NUM!	-3.52157	#NUM!	#NUM!	#NUM!	#NUM!	#NUM!	-1.59588	#NUM!	#NUM!	#NUM!	#NUM!	#NUM!	#NUM!	#NUM!	0.580264	1.57057	1.07745	-1.61572	-3.08986	#NUM!	0.587584	#NUM!	#NUM!	#NUM!	#NUM!	#NUM!	#NUM!	#NUM!
AMI	3	#NUM!	#NUM!	#NUM!	#NUM!	#NUM!	#NUM!	#NUM!	#NUM!	#NUM!	#NUM!	#NUM!	#NUM!	-0.188656	#NUM!	#NUM!	#NUM!	#NUM!	#NUM!	#NUM!	#NUM!	#NUM!	#NUM!	#NUM!	#NUM!	#NUM!	#NUM!	#NUM!	#NUM!	#NUM!	#NUM!	#NUM!	#NUM!	#NUM!	#NUM!	#NUM!	2.52778	0.937157	-1.90413	#NUM!	#NUM!	0.802955	#NUM!	#NUM!	#NUM!	#NUM!	#NUM!	#NUM!	#NUM!
PAL	2	#NUM!	#NUM!	#NUM!	#NUM!	#NUM!	#NUM!	#NUM!	#NUM!	#NUM!	#NUM!	#NUM!	#NUM!	-1.67072	#NUM!	#NUM!	#NUM!	-3.72127	#NUM!	#NUM!	#NUM!	#NUM!	#NUM!	#NUM!	#NUM!	#NUM!	#NUM!	#NUM!	#NUM!	#NUM!	#NUM!	#NUM!	#NUM!	#NUM!	#NUM!	#NUM!	0.997144	-0.546521	-1.28885	#NUM!	#NUM!	#NUM!	#NUM!	#NUM!	#NUM!	#NUM!	#NUM!	#NUM!	#NUM!
ZIP	1	#NUM!	#NUM!	#NUM!	#NUM!	#NUM!	#NUM!	#NUM!	#NUM!	#NUM!	#NUM!	#NUM!	#NUM!	-2.99037	#NUM!	#NUM!	#NUM!	#NUM!	#NUM!	#NUM!	#NUM!	#NUM!	#NUM!	#NUM!	#NUM!	#NUM!	#NUM!	#NUM!	#NUM!	#NUM!	#NUM!	#NUM!	#NUM!	#NUM!	#NUM!	#NUM!	0.346405	#NUM!	#NUM!	#NUM!	#NUM!	#NUM!	#NUM!	#NUM!	#NUM!	#NUM!	#NUM!	#NUM!	#NUM!
CLO	7	-2.29495	-0.879625	#NUM!	#NUM!	#NUM!	#NUM!	#NUM!	#NUM!	#NUM!	#NUM!	#NUM!	#NUM!	-0.0162287	#NUM!	#NUM!	#NUM!	#NUM!	#NUM!	#NUM!	#NUM!	-0.578284	#NUM!	#NUM!	#NUM!	#NUM!	#NUM!	1.08858	#NUM!	#NUM!	#NUM!	#NUM!	#NUM!	#NUM!	#NUM!	2.91109	4.123	3.86474	-1.16489	#NUM!	#NUM!	2.74974	#NUM!	#NUM!	#NUM!	#NUM!	#NUM!	0.27611	#NUM!
CHL	2	-1.72135	-3.3971	#NUM!	#NUM!	#NUM!	#NUM!	#NUM!	#NUM!	#NUM!	#NUM!	#NUM!	#NUM!	-1.85569	#NUM!	#NUM!	#NUM!	0.421861	#NUM!	#NUM!	#NUM!	#NUM!	#NUM!	#NUM!	#NUM!	#NUM!	#NUM!	-0.335204	#NUM!	#NUM!	#NUM!	#NUM!	#NUM!	#NUM!	#NUM!	#NUM!	#NUM!	1.98224	-3.02248	#NUM!	#NUM!	#NUM!	#NUM!	#NUM!	#NUM!	#NUM!	#NUM!	#NUM!	#NUM!
HAL	4	0.604099	-0.755367	#NUM!	#NUM!	0.0536394	#NUM!	#NUM!	#NUM!	#NUM!	#NUM!	#NUM!	#NUM!	-1.44939	#NUM!	#NUM!	#NUM!	-2.82896	#NUM!	#NUM!	#NUM!	-1.24667	#NUM!	#NUM!	#NUM!	#NUM!	#NUM!	-1.0363	#NUM!	#NUM!	#NUM!	#NUM!	#NUM!	#NUM!	#NUM!	-1.34345	#NUM!	2.29332	-2.80799	#NUM!	#NUM!	-4.53924	#NUM!	#NUM!	#NUM!	#NUM!	#NUM!	#NUM!	#NUM!
TdP/QT prolongation
		Electrocardiogram QT interval abnormal	Electrocardiogram QT prolonged	Long QT syndrome	Long QT syndrome congenital	Torsade de pointes	Ventricular tachycardia
OLA		7	469	28		69	30
QUE		11	690	33		43	60
RIS		3	266	19		55	27
ARI			361	17		20	15
AMI			70			2	6
PAL			49	6		10
ZIP			35	3		5	11
CLO		4	305	14		18	9
CHL			77	8		23	6
HAL		3	204	5		51	14
		61	7633	574	5	1362	2739
ROR		Electrocardiogram QT interval abnormal	Electrocardiogram QT prolonged	Long QT syndrome	Long QT syndrome congenital	Torsade de pointes	Ventricular tachycardia
OLA		7.06363	6.63175	4.92549		5.32842	1.18563
QUE		7.39453	5.20979	3.21211		1.80795	1.26357
RIS		3.03805	3.24633	2.93863		3.6855	0.923488
ARI			4.37702	2.62244		1.35333	0.517408
AMI			10.4126			1.54425	2.36352
PAL			2.06067	2.86495		2.23545
ZIP			6.76259	2.66356		2.26193	2.62295
CLO		5.2347	6.71383	3.73305		2.16877	0.570613
CHL			8.30312	7.30051		11.3184	1.77116
HAL		4.46833	5.6887	1.73736		7.54548	1.09681
IC		Electrocardiogram QT interval abnormal	Electrocardiogram QT prolonged	Long QT syndrome	Long QT syndrome congenital	Torsade de pointes	Ventricular tachycardia
OLA		2.82041	2.72939	2.30027	#NUM!	2.41371	0.245656
QUE		2.88646	2.38123	1.68352	#NUM!	0.854352	0.337501
RIS		1.60314	1.69881	1.55514	#NUM!	1.88186	-0.114835
ARI		#NUM!	2.12995	1.39091	#NUM!	0.436511	-0.950626
AMI		#NUM!	3.38026	#NUM!	#NUM!	0.62691	1.24094
PAL		#NUM!	1.04311	1.51851	#NUM!	1.16056	#NUM!
ZIP		#NUM!	2.75758	1.41335	#NUM!	1.17755	1.39119
CLO		2.38811	2.74714	1.90035	#NUM!	1.11688	-0.809416
CHL		#NUM!	3.05365	2.868	#NUM!	3.50059	0.824697
HAL		2.15974	2.5081	0.796899	#NUM!	2.91561	0.133308
ic025		Electrocardiogram QT interval abnormal	Electrocardiogram QT prolonged	Long QT syndrome	Long QT syndrome congenital	Torsade de pointes	Ventricular tachycardia
OLA	4	1.51805	2.5769	1.66898	#NUM!	2.01441	-0.363754
QUE	4	1.86206	2.25553	1.10305	#NUM!	0.347036	-0.0910136
RIS	3	-0.466222	1.49621	0.784615	#NUM!	1.43406	-0.757989
ARI	2	#NUM!	1.9561	0.574739	#NUM!	-0.313885	-1.8216
AMI	1	#NUM!	2.98386	#NUM!	#NUM!	-1.96616	-0.174115
PAL	3	#NUM!	0.568327	0.103457	#NUM!	0.0833788	#NUM!
ZIP	2	#NUM!	2.19426	-0.656011	#NUM!	-0.384626	0.366788
CLO	4	0.62296	2.55796	0.99751	#NUM!	0.324511	-1.94838
CHL	3	#NUM!	2.67587	1.6554	#NUM!	2.8023	-0.590356
HAL	3	0.0903698	2.27665	-0.765281	#NUM!	2.45036	-0.769537
[truncated: 11 more columns]
